# Supplementary material for: Impact of kinesiophobia on initiation of cardiac rehabilitation: a prospective cohort path analysis
Source: HighWire-hosted journal article supplement (doi:10.1136/bmjopen-2022-066435), 2022-11-01
Supplement: bmjopen-2022-066435supp001_data_supplement.pdf [file bmjopen-2022-066435supp001_data_supplement.pdf]

Supplementary Table 1: Statistical Analysis

| Variable                          | Data type  | Missing data (%) | Regressed on outcome:<br>1. TSK NL- Heart<br>2. CR initiation |
|-----------------------------------|------------|------------------|---------------------------------------------------------------|
| <b>Demographics</b>               |            |                  |                                                               |
| Age                               | Continuous | -                | 1+2                                                           |
| Female Sex                        | Binary     | -                | 1+2                                                           |
| Higher Education                  | Binary     | -                | 1+2                                                           |
| <b>Index event</b>                |            |                  |                                                               |
| Acute coronary syndrome           | Binary     | -                | 1+2                                                           |
| Stable angina revascularization   | Binary     | -                | 1+2                                                           |
| Atrial Fibrillation               | Binary     | -                | 1+2                                                           |
| <b>Admission</b>                  |            |                  |                                                               |
| Acute admission                   | Binary     | -                | 1+2                                                           |
| <b>Treatment index event</b>      |            |                  |                                                               |
| PCI                               | Binary     | -                | 1+2                                                           |
| ECV                               | Binary     | -                | 1+2                                                           |
| Medication only                   | Binary     | -                | 1+2                                                           |
| <b>Cardiac disease history</b>    |            |                  |                                                               |
| Acute coronary syndrome           | Binary     | -                | 1+2                                                           |
| PCI                               | Binary     | -                | 1+2                                                           |
| CABG                              | Binary     | -                | 1+2                                                           |
| Stroke                            | Binary     | -                | 1+2                                                           |
| Peripheral artery disease         | Binary     | -                | 1+2                                                           |
| <b>CVD risk factors</b>           |            |                  |                                                               |
| Diabetes mellitus                 | Binary     | -                | 1+2                                                           |
| History of hypertension           | Binary     | -                | 1+2                                                           |
| History of dyslipidaemia          | Binary     | -                | 1+2                                                           |
| BMI                               | Continuous | -                | 1+2                                                           |
| <b>Psychological risk factors</b> |            |                  |                                                               |
| GSES General Self-Efficacy scale  | Continuous | 26 (17.4)        | 1+2                                                           |
| HADS Anxiety                      | Continuous | 26 (17.4)        | 1+2                                                           |
| HADS Depression                   | Continuous | 26 (17.4)        | 1+2                                                           |
| IMSA Biological complexity        | Continuous | 28 (18.8)        | 1+2                                                           |
| IMSA Psychological complexity     | Continuous | 28 (18.8)        | 1+2                                                           |
| IMSA Social complexity            | Continuous | 28 (18.8)        | 1+2                                                           |

|                                   |            |           |     |
|-----------------------------------|------------|-----------|-----|
| CAQ Cardiac anxiety               | Continuous | 25 (16.8) | 1+2 |
| <b>Outcomes variables</b>         |            |           |     |
| Cardiac rehabilitation initiation | Binary     | -         | -   |
| TSK Tampa Scale for Kinesiophobia | Continuous | 34 (22.8) | 2   |

Missing data analyses

This study was part of a large project where data were collected at 4 timepoints (hospital discharge, 3 weeks, 6 weeks and 12 weeks). Patients were included in the analyses if they completed the TSK-Heart NL questionnaire on, at least, one of the abovementioned timepoints. In total, 149 patients were included in the analyses. Missing values of the TSK-NL Heart were: Hospital discharge: 34 (22.8%), 3 weeks: 37 (24.8%), 6 weeks: 42 (28.2%), 12 weeks: 54 (36.2%). Little’s MCAR test was used to determine patterns of missing data. (Little’s MCAR Test Chi Square = 4871,310 DF= 4995, Sig =0.893). A full conditional model (FCS MI) was used to impute data in m=5 datasets. FCS MI is a powerful method to create multiple imputations in datasets with categorical and continuous variables and is well suited for datasets with complex structures [1].

1. Liu Y, De A. Multiple Imputation by Fully Conditional Specification for Dealing with Missing Data in a Large Epidemiologic Study. *Int J Stat Med Res.* 2015;4(3):287-295. doi: 10.6000/1929-6029.2015.04.03.7. Epub 2015 Aug 19. PMID: 27429686; PMCID: PMC4945131.
